# Supplementary material
Source: PubMed Central journal article supplement (PMC5851867)
Supplement: NIHMS944821-supplement-finalized_supp_material.pdf [file NIHMS944821-supplement-finalized_supp_material.pdf]

## **Supplementary material**

### **Material and methods**

#### **Production of WNV envelope protein DIII in *N. benthamiana* plants**

The coding sequence of WNV DIII (amino acid 296-415, Genbank Acc.No. AF196835) was synthesized with an 18-bp sequence coding for the hexa-histidine tag (His<sub>6</sub>) added to the 3' terminus of the DIII gene, and subsequently cloned into the plant expression vector. *N. benthamiana* plants were grown and agroinfiltrated with the GV3101 strain containing the DIII-His<sub>6</sub> construct. Agroinfiltrated *N. benthamiana* leaves were harvested 4 days post infiltration, and homogenized in extraction buffer (100 mM Tris-HCl, pH 8.0, 150 mM NaCl, 1 mM PMSF, tablet protease inhibitor cocktail (Sigma, Germany)). The pH of the clarified extract was adjusted to 5.0, and subjected to centrifugation at 18,000 × *g* for 30 min at 4 °C. The supernatant was recovered, pH adjusted back to 8.0, and then subjected to Ni IMAC on a 4-ml His.Bind column in accordance with the manufacturer's instruction (Millipore, USA). The purified WNV DIII was eluted with imidazole and the eluate was dialyzed against PBS.

#### **Plaque reduction neutralization test (PRNT) assay**

Serum samples were diluted (1:10 and 1:100) in Opti-MEM serum free medium, while WNV (CT2741) was diluted in Opti-MEM serum free medium (ThermoFisher, NY) to a working concentration of 10<sup>2</sup> PFU per well. Following dilutions, WNV was added to diluted sera and incubated for 1 hr at room temperature. Virus/serum mixture was then transferred to plates containing 90-95% confluent monolayers of Vero cells (ATCC # CCL-81) and incubated for 1 hr at 37 °C with 5% CO<sub>2</sub>. After removing the virus/serum-containing medium, Vero cells were overlaid with fresh MEM medium containing 1% SeaPlaque™ agarose (Lonza, MD) and further

incubated at 37°C with 5% CO<sub>2</sub> for an additional 72 hr. Plaques were counted after staining with 4% (vol/vol) neutral red. Percent (%) neutralization was calculated as: [(number of WMV plaque per well without test serum) - (number of WNV plaque per well of diluted test serum) / (number of WNV plaque per well without test serum) x 100]. Experiments were repeated twice.

### **Splenocyte culture and cytokine production**

Single-cell suspensions of the spleens from immunized mice were prepared by mechanical dissociation. Cultures of splenocytes at  $5 \times 10^6$  cells /ml were stimulated with 10 µg/ml of DIII, T cell mitogen Con A (positive control, 5 µg/ml, MilliporeSigma, MA) or culture medium (negative control). The supernatant from splenocyte cultures was collected 24 and 48 hr after stimulation and aliquots were stored at -80°C. Cytokine concentration was quantitated by a multiplex analysis using a custom mouse cytokine kit containing IL-4, IL-6, and IFN-γ (Bio-Rad, CA) following the manufacturer's protocol. Data collection was performed with a Bio-Plex 200 system with Bio-Plex Manager software (version 5.0, Bio-Rad, CA). Each cytokine was measured in triplicate with at least two independent experiments.

### **Antibody-dependent enhancement Assay**

Sera collected from vaccinated mice at week 11 were pooled and total IgG was isolated using IgG purification kits (GE Healthcare, PA). DENV-2 (ATCC#VR-1584) or ZIKV (PRVABC59, ATCC# VR-1843) was mixed with each of eight 3-fold serial dilutions of IgG or an anti-flavivirus E mAb (4G2) (ATCC # HB-112) as positive control, respectively. The antibody-virus mixtures were first incubated at 37°C for 1 hr and then added to FcγRIIA<sup>+</sup> K562 cells (ATCC # CCL-2243) at an MOI of 1.0. Infected K562 cells were collected after incubating for 48 hr (DENV-2) or 72 hr (ZIKV) at 37°C with 5% CO<sub>2</sub>. K562 cells were then fixed with 4% paraformaldehyde (MilliporeSigma, MA), permeabilized with 0.1% saponin (MilliporeSigma, MA)

and fluorescently labeled with Alexa Fluor488 (Invitrogen, CA). The percentage of infected cells was then determined by flow cytometry.

## Results

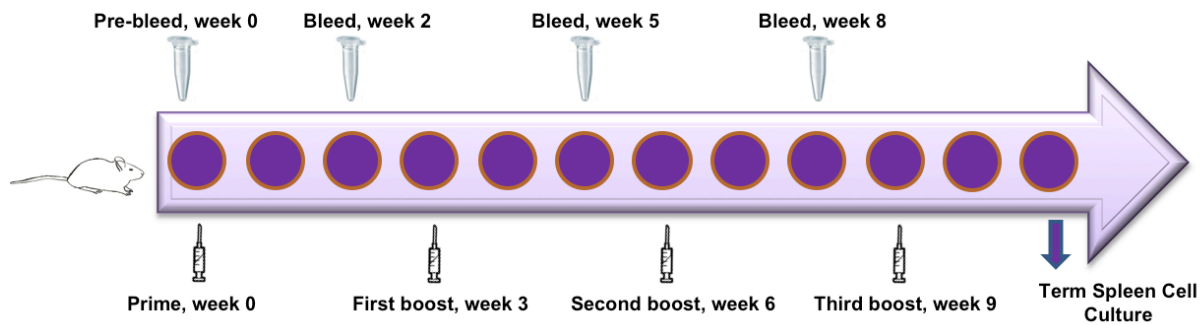

**Figure S1. Time course of plant-DIII immunization in mice.** BALB/c mice (n = 6 per group) were immunized subcutaneously with four doses of plant-DIII (25  $\mu$ g per dosage) with alum as adjuvant over an 11-week time period. Antigen was injected on weeks 0, 3, 6 and 9. Blood samples were collected on weeks 0 (preimmune bleed), 2, 5, and 8 (2 weeks after each antigen injection). On day 77 (week 11), mice were humanely euthanized, final blood samples were collected, and the spleens were aseptically removed for *in vitro* splenocyte cultures.

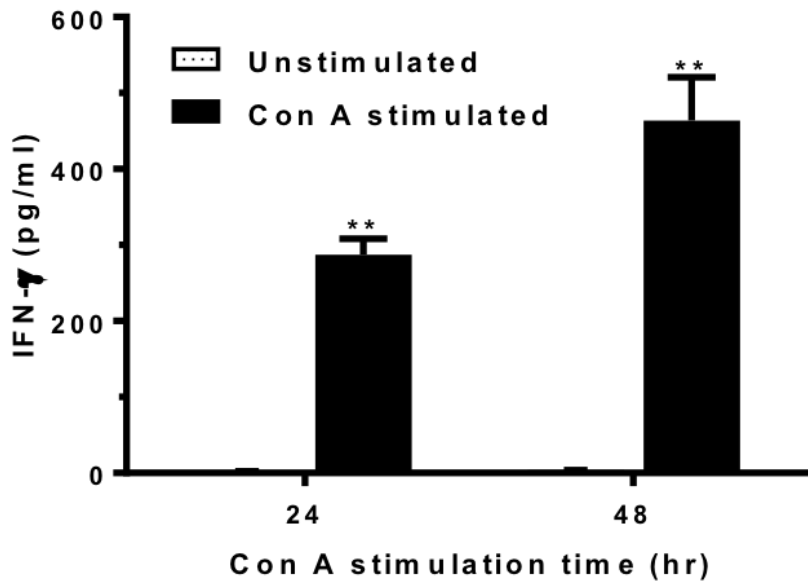

**Figure S2. Interferon gamma production from plant-DIII immunized mice.**

Splenocytes from mice injected with 25  $\mu$ g plant-DIII were stimulated *in vitro* with Con A for 24 to 48 hr. The production of IFN- $\gamma$  was quantitated and the mean concentration (pg/ml) and SD from at least two independent experiments are presented. The induction of IFN- $\gamma$  by Con A stimulation is observed compared to unstimulated samples ( $p < 0.005$ ).
